# Supplementary material for: Nuciferine attenuates acute ischemic stroke in a rat model: a metabolomic approach for the mechanistic study
Source: Royal Society of Chemistry journal article supplement (doi:10.1039/d2mo00158f), 2022-07-11
Supplement: d2mo00158f1.pdf [file d2mo00158f1.pdf]

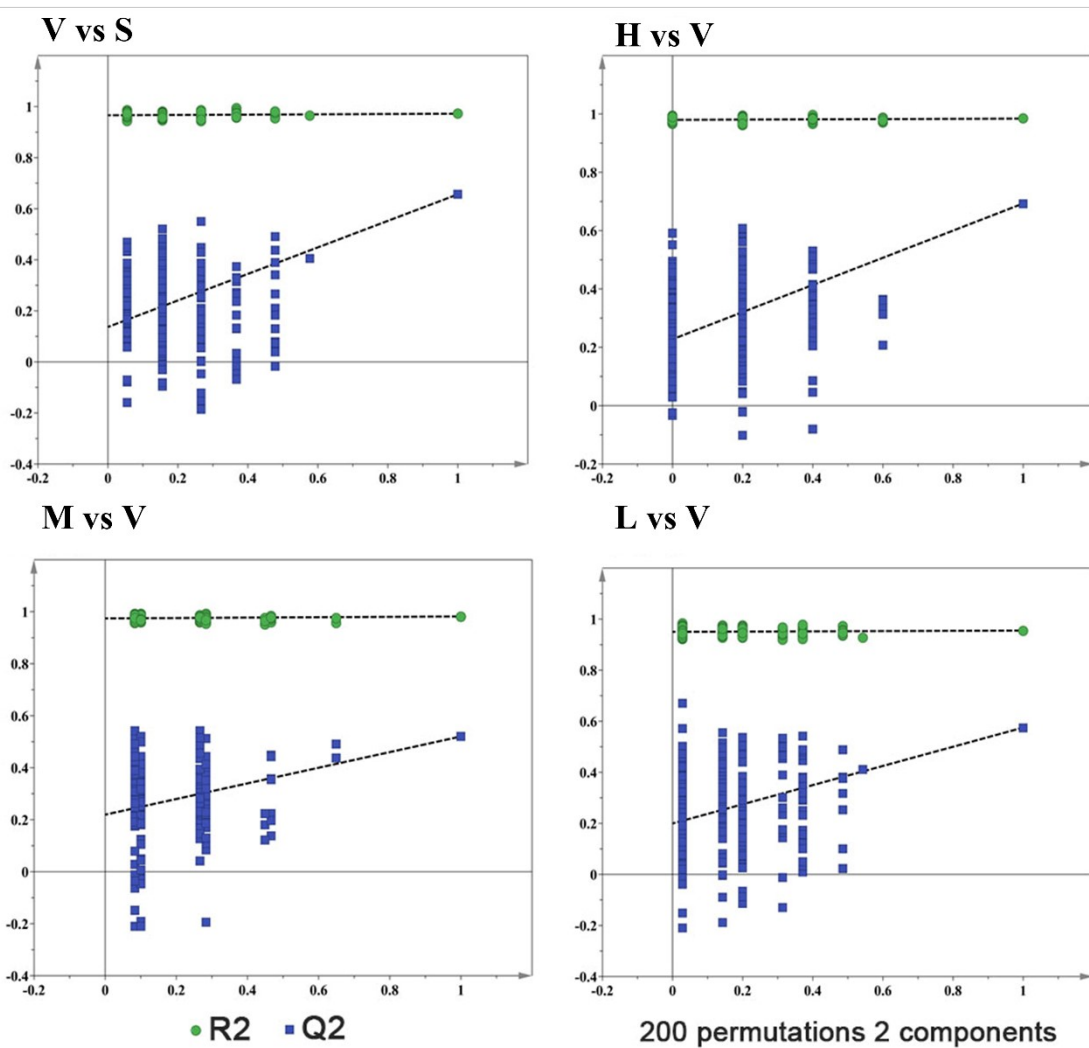

Figure S1. Cross-validated scores plots for <sup>1</sup>H NMR based profiling.



Table S1 Sequences of primers used for quantitative real-time PCR

| Gene   | Full Name                           | Sequences of primers (5'-3') |                         |
|--------|-------------------------------------|------------------------------|-------------------------|
|        |                                     | Sense                        | Antisense               |
| MPO    | myeloperoxidase                     | GGGATACAATGCCTGGAGACG        | TTGTTGGGCGTGCCATACTG    |
| CAT    | catalase                            | ATTGCCGTCCGATTCTCCA          | AGGGTCCTTCAGGTGAGTTTGT  |
| CBS    | cystathionine-beta-synthase         | GAAGGAGAAGTGCCCAGGTTG        | CATTGCTCTTGAACCACCTATCC |
| ACHE   | acetylcholinesterase                | CCTCCTTGGACGTGTATGAC         | AAAGGTTCCCACTCGGTAG     |
| CHAT   | choline acetyltransferase           | CTGCTGTTATGGACCCG            | AGATTGCTTGGCTTGGTT      |
| PRDX6  | peroxiredoxin 6                     | ATCCGCTTCCACGATTTC           | GGTCCCTGTCCTTATCGTCG    |
| MGLL   | monoglyceride lipase                | CAACTCCGACCCACTCATCTG        | TGCCACTGCTATCCTGTGAGAC  |
| BCHE   | butyrylcholinesterase               | AGTGACTGCCTTTCTCG            | TTCCACATTTCTGACCC       |
| CKB    | creatine kinase B                   | GACTGGCGTAGACAATCCGG         | TGCTCATCACTGGGCTGGTA    |
| PLD1   | phospholipase D1                    | TGGGATTGACCTGGCCTATG         | GCCTTTTCAGTTTCATGTCGGT  |
| ANXA3  | annexin-3                           | ATGGCGGCGTCTTTG              | CCTGCTTGCCTGGTTG        |
| AKR1B1 | aldose reductase                    | GGACACTTGGACGGCTATGG         | GGCAGTACTCAATCAGCTTCTCC |
| ACOT4  | acyl-CoA thioesterase 4             | CTCCAACACCCGAAGGTA AAA       | TATCCACAATGTCCAGAATGCC  |
| GATM   | glycine amidinotransferase          | ATGGCTGACGAACTGTATGACC       | TATGCACTCTGTAGTCTGGGGC  |
| GOT1   | glutamic-oxaloacetic transaminase 1 | TCCATCTTTGTCCTCCACGC         | GCCCAGGCATCTTTCTCTAGG   |
